# Supplementary material for: let-7 coordinates the transition to adulthood through a single primary and four secondary targets
Source: Life Sci Alliance. 2019 Mar 25;2(2):e201900335. doi: 10.26508/lsa.201900335 (PMC6435043; doi:10.26508/lsa.201900335)
Supplement: Supplementary file 1 [file LSA-2019-00335_TableS1.xlsx]

## Sheet: TableS1
Table S1A
worm line	descriptive name	% burst exp1	% burst exp2	% burst exp3	AVERAGE	STDEV
N2	wild-type	0	0	0	0	0
let-7(n2853)	let-7(PM)	92.0177	90.7071	85.2679	89.3309	3.57919
lin-41(xe8)	lin-41(∆LCS)	86.8561	89.9329	88.756	88.515	1.55247
lin-41(xe11); let-7(n2853)	lin-41(CPM); let-7(PM)	0	0	0	0	0
lin-41(xe11)	lin-41(CPM)	0.481928	0.219298	0	0.233742	0.241288
lin-29(xe40)	lin-29(∆a)	1.69492	1.58014	2.11765	1.79757	0.283077
mab-10(xe44)	mab-10(0)	0.229885	0	0.235849	0.155245	0.134479
mab-10(xe44) lin-29(xe40)	mab-10(0) lin-29(∆a)	15.3499	17.0115	9.97831	14.1132	3.67606
mab-3(xe49); dmd-3(ok1327)	mab-3(0); dmd-3(lf)	0.222222	0	0	0.0740741	0.1283
mab-3(xe49) mab-10(xe44) lin-29(xe40); dmd-3(ok1327)	mab-3(0) mab-10(0) lin-29(∆a); dmd-3(lf)	14.0187	15.5606	10.2975	13.2923	2.70573
lin-29(xe37)	lin-29(0)	2.34375	0.959233	2.07373	1.79224	0.733929
mab-10(xe44) lin-29(xe37)	mab-10(0) lin-29(0)	1.91489	1.20192	1.55902	1.55861	0.356485
Table S1B
worm line	descriptive name	% burst exp1	% burst exp2	% burst exp3	AVERAGE	STDEV
let-7(n2853)	let-7(PM)	90.6504	96.1165	94.3128	93.6932	2.78522
lin-29(xe37); let-7(n2853)	lin-29(0); let-7(PM)	0.707547	0.992556	0.224719	0.641607	0.388142
lin-29(xe40); let-7(n2853)	lin-29(∆a); let-7(PM)	20.2128	12.4717	13.0802	15.2549	4.30444
mab-10(xe44); let-7(n2853)	mab-10(0); let-7(PM)	93.6652	91.5074	97.4359	94.2028	3.00058
mab-10(xe44) lin-29(xe40); let-7(n2853)	mab-10(0) lin-29(∆a); let-7(PM)	15.9919	15.0224	13.3333	14.7826	1.34542
Table S1C
worms from lines balanced with mnC1	descriptive name	% burst exp1	% burst exp2	% burst exp3	AVERAGE	STDEV
mab-3(xe49) mab-10(xe44) lin-29(xe40); dmd-3(ok1327)	mab-3(0) mab-10(0) lin-29(∆a); dmd-3(lf)	8.29268	12.6949	16.1435	12.377	3.93505
mab-10(xe44) lin-29(xe40)	mab-10(0) lin-29(∆a)	13.7681	14.554	20.9877	16.4366	3.96088
xeSi417 mab-10(xe44) lin-29(xe40)	xeSi417 mab-10(0) lin-29(∆a)	51.7454	50.641	50.8434	51.0766	0.587957
lin-29(xe37)	lin-29(0)	0.681818	0.982801	0.917431	0.860683	0.158313
xeSi417 lin-29(xe37)	xeSi417 lin-29(0)	95.122	92.8416	93.318	93.7605	1.20284
Table S1D
worm line	descriptive name	% Pvl exp1	% Pvl exp2	% Pvl exp3	AVERAGE	STDEV
N2	wild-type	0	0	0	0	0
mab-10(xe44)	mab-10(0)	0.247525	0	0.246914	0.164813	0.142732
lin-29(xe40)	lin-29(∆a)	68.4685	64.186	53.2864	61.9803	7.8277
mab-10(xe44) lin-29(xe40)	mab-10(0) lin-29(∆a)	96.8675	98.5112	97.7556	97.7114	0.822739
lin-29(xe37)	lin-29(0)	98.6047	99.5516	99.0762	99.0775	0.47346
mab-10(xe44) lin-29(xe37)	mab-10(0) lin-29(0)	96.8215	98.2927	98.6047	97.9063	0.952298
Table S1E
worm line	descriptive name	% Egl exp1	% Egl exp2	% Egl exp3	AVERAGE	STDEV
N2	wild-type	0	0	0	0	0
mab-10(xe44)	mab-10(0)	6.60592	4.18605	5.94714	5.5797	1.25108
lin-29(xe40)	lin-29(∆a)	82.5843	83.9416	79.6574	82.0611	2.1895
mab-10(xe44) lin-29(xe40)	mab-10(0) lin-29(∆a)	97.1014	98.8584	98.2544	98.0714	0.892671
lin-29(xe37)	lin-29(0)	99.0361	99.2771	99.5726	99.2953	0.268715
mab-10(xe44) lin-29(xe37)	mab-10(0) lin-29(0)	97.3171	98.5612	97.6852	97.8545	0.639082
