# Supplementary material for: let-7 coordinates the transition to adulthood through a single primary and four secondary targets
Source: Life Sci Alliance. 2019 Mar 25;2(2):e201900335. doi: 10.26508/lsa.201900335 (PMC6435043; doi:10.26508/lsa.201900335)
Supplement: Supplementary file 2 [file LSA-2019-00335_TableS2.xlsx]

## Sheet: tableS2
Stage: late L4		number of seam cells																		n
worm line with scm marker	descriptive name	15	16	17	18	19	20	21	22	23	24	25	26	27	28	29	30	31	32
N2	wild-type	5	60	35	0	0	0	0	0	0	0	0	0	0	0	0	0	0	0	20
let-7(n2853)	let-7(PM)	0	65	20	15	0	0	0	0	0	0	0	0	0	0	0	0	0	0	20
lin-41(xe8)	lin-41(∆LCS)	0	80	20	0	0	0	0	0	0	0	0	0	0	0	0	0	0	0	20
lin-41(xe11); let-7(n2853)	lin-41(CPM); let-7(PM)	0	55	30	15	0	0	0	0	0	0	0	0	0	0	0	0	0	0	20
lin-41(xe11)	lin-41(CPM)	0	71.4286	23.8095	4.7619	0	0	0	0	0	0	0	0	0	0	0	0	0	0	21
mab-10(xe44)	mab-10(0)	0	65	30	5	0	0	0	0	0	0	0	0	0	0	0	0	0	0	20
lin-29(xe40)	lin-29(∆a)	0	65	35	0	0	0	0	0	0	0	0	0	0	0	0	0	0	0	20
mab-10(xe44) lin-29(xe40)	mab-10(0) lin-29(∆a)	0	65	20	15	0	0	0	0	0	0	0	0	0	0	0	0	0	0	20
mab-3(xe49); dmd-3(ok1327)	mab-3(0); dmd-3(lf)	0	75	20	5	0	0	0	0	0	0	0	0	0	0	0	0	0	0	20
lin-29(xe37)	lin-29(0)	0	80	15	5	0	0	0	0	0	0	0	0	0	0	0	0	0	0	20
Stage: young adult		number of seam cells																		n
worm line with scm marker	descriptive name	15	16	17	18	19	20	21	22	23	24	25	26	27	28	29	30	31	32
N2	wild-type	0	69.2308	25	5.76923	0	0	0	0	0	0	0	0	0	0	0	0	0	0	52
let-7(n2853)	let-7(PM)	1.92308	17.3077	15.3846	3.84615	0	0	3.84615	1.92308	0	0	9.61538	13.4615	15.3846	13.4615	0	1.92308	0	1.92308	52
lin-41(xe8)	lin-41(∆LCS)	1.85185	20.3704	12.963	0	0	0	1.85185	1.85185	3.7037	0	11.1111	16.6667	9.25926	7.40741	11.1111	0	1.85185	0	54
lin-41(xe11); let-7(n2853)	lin-41(CPM); let-7(PM)	1.92308	53.8462	30.7692	13.4615	0	0	0	0	0	0	0	0	0	0	0	0	0	0	52
lin-41(xe11)	lin-41(CPM)	0	68.5185	27.7778	3.7037	0	0	0	0	0	0	0	0	0	0	0	0	0	0	54
mab-10(xe44)	mab-10(0)	1.88679	56.6038	33.9623	7.54717	0	0	0	0	0	0	0	0	0	0	0	0	0	0	53
lin-29(xe40)	lin-29(∆a)	1.92308	65.3846	26.9231	5.76923	0	0	0	0	0	0	0	0	0	0	0	0	0	0	52
mab-10(xe44) lin-29(xe40)	mab-10(0) lin-29(∆a)	0	23.2143	16.0714	3.57143	0	0	0	1.78571	1.78571	0	12.5	12.5	8.92857	10.7143	1.78571	3.57143	1.78571	1.78571	56
mab-3(xe49); dmd-3(ok1327)	mab-3(0); dmd-3(lf)	0	79.6296	18.5185	1.85185	0	0	0	0	0	0	0	0	0	0	0	0	0	0	54
lin-29(xe37)	lin-29(0)	0	0	0	0	0	0	0	0	0	0	1.96078	17.6471	23.5294	25.4902	11.7647	9.80392	7.84314	1.96078	51
