# Supplementary material for: let-7 coordinates the transition to adulthood through a single primary and four secondary targets
Source: Life Sci Alliance. 2019 Mar 25;2(2):e201900335. doi: 10.26508/lsa.201900335 (PMC6435043; doi:10.26508/lsa.201900335)
Supplement: Supplementary file 4 [file LSA-2019-00335_TableS4.xlsx]

## Sheet: tableS4
Presence of the thin utse structure between uterus and vulva
worm line	descriptive name	thin utse	thick cell layer	n
N2	wild-type	100	0	40
lin-29(xe37)*	lin-29(0)	2.22222	97.7778	45
xeSi417 lin-29(xe37)*	xeSi417 lin-29(0)	100	0	43
mab-10(xe44) lin-29(xe40)*	mab-10(0) lin-29(∆a)	47.9167	52.0833	48
xeSi417 mab-10(xe44) lin-29(xe40)*	xeSi417 mab-10(0) lin-29(∆a)	100	0	44
*these worms were obtained from lines balanced with mnC1
